# Supplementary material for: Pachymic acid alleviates metabolic dysfunction-associated steatotic liver disease by inhibiting ferroptosis through PPARα
Source: Front Pharmacol. 2025 May 6;16:1554850. doi: 10.3389/fphar.2025.1554850 (PMC12088974; doi:10.3389/fphar.2025.1554850)
Supplement: Supplementary file 3 [file Table4.xls]

## Sheet: Sheet1
gene_name	HFD1	HFD2	HFD3	HFD4	HFD5	HFD6	Pachymic_acid1	Pachymic_acid2	Pachymic_acid3	Pachymic_acid4	Pachymic_acid5	Pachymic_acid6	pval	qval	fc	log2(fc)	regulation	significant
Slc27a4	2.26626	2.00636	1.87972	2.73589	1.49492	1.40764	7.35983	7.25259	8.18864	7.46466	7.53167	7.68031	4.75385e-35	4.63455e-33	0.259266	-1.9475	down	yes
Pdpk1	0.679765	0.512374	0.63743	0.543254	0.366999	0.398332	2.31997	2.18122	2.76959	2.34444	2.59119	1.71597	6.23086e-33	5.03586e-31	0.225404	-2.14942	down	yes
Hmgcs1	18.9008	13.1301	13.8007	14.9445	11.5957	14.4869	8.6275	7.12979	8.45908	5.88004	7.46741	5.85606	8.02041e-31	5.56028e-29	2.00044	1.00031	up	yes
Apoa2	15602	12537.2	13809.1	17479.9	7274.6	14571.8	6907.02	6122.54	6494.32	5238.38	6359.24	5551.79	9.0919e-31	6.26137e-29	2.21618	1.14808	up	yes
Rxra	22.4477	21.7757	23.9659	29.6568	19.5195	19.2086	63.9436	61.6809	72.7028	66.9508	75.1994	65.5458	2.39681e-25	1.00909e-23	0.33637	-1.57188	down	yes
Acsl4	2.24635	1.68155	1.12175	1.84241	0.716723	1.10661	6.57273	5.32089	6.50822	7.11245	6.4537	7.39419	2.84928e-20	7.66946e-19	0.221415	-2.17517	down	yes
Ehhadh	49.6052	30.518	19.251	44.5762	9.24028	19.7465	164.346	145.539	313.312	305.711	253.824	185.406	8.30345e-19	1.95504e-17	0.126403	-2.9839	down	yes
Ppara	4.25657	3.66271	4.02701	5.2328	2.70667	2.80081	14.3712	12.8974	21.7125	22.0687	17.4581	10.0324	2.1629e-17	4.43047e-16	0.230227	-2.11887	down	yes
Acox2	23.1449	17.5872	13.8518	16.4105	10.8161	11.2347	48.1337	67.6495	49.6554	49.0593	52.6972	45.5753	1.26072e-16	2.39822e-15	0.297487	-1.7491	down	yes
Slc27a5	120.284	80.7553	79.814	103.201	39.5798	72.7757	274.438	241.992	258.315	291.945	270.488	268.518	3.05213e-15	5.00881e-14	0.309155	-1.6936	down	yes
Fads2	75.5284	37.4418	30.4779	53.0856	22.7593	36.399	168.769	142.953	150.529	230.097	208.762	144.684	7.8649e-14	1.11986e-12	0.244496	-2.03212	down	yes
Plin4	16.0516	19.6481	33.4225	40.0266	27.8988	28.4477	9.83174	6.39692	14.6856	16.879	11.6641	9.20699	4.31505e-13	5.66091e-12	2.4102	1.26915	up	yes
Apoa5	281.121	185.909	211.956	190.179	126.87	170.234	491.307	393.914	574.371	553.325	542.076	639.448	6.75342e-13	8.65598e-12	0.365093	-1.45366	down	yes
Acsl5	18.1888	9.17757	6.90229	9.67747	3.6595	7.06399	43.4232	41.5189	36.483	36.3482	39.3696	28.7325	6.41695e-12	7.33026e-11	0.242035	-2.04672	down	yes
Sorbs1	0.292411	0.27386	0.292658	0.362331	0.150691	0.224975	0.880711	0.67488	1.31607	1.31843	1.22116	0.628139	3.36789e-11	3.52341e-10	0.264418	-1.91911	down	yes
Me1	19.0781	8.58887	6.39101	8.69543	3.9745	8.13005	45.818	47.0659	42.8824	27.2326	38.708	30.9024	6.37687e-11	6.48644e-10	0.235837	-2.08414	down	yes
Cyp4a31	4.89612	5.04974	3.22469	10.2521	2.10758	4.74678	17.8301	14.3016	36.7447	30.2345	23.3999	31.9261	7.99402e-11	8.03446e-10	0.196048	-2.35072	down	yes
Cpt1b	1.89963	3.18178	2.44842	4.11513	2.10393	1.98494	0.871659	0.774239	0.837199	1.75084	1.20486	1.97288	5.3741e-10	4.86806e-09	2.12284	1.086	up	yes
Cpt1a	30.3111	22.6613	20.3569	23.6118	15.4091	17.4256	40.5065	41.7425	51.0445	69.0104	54.4227	61.4417	9.57758e-08	6.62509e-07	0.407884	-1.29377	down	yes
Cpt1c	0.167555	0.137594	0.128705	0.20565	0.126598	0.139932	0.0699544	0.0716361	0.0471546	0.0509051	0.0534263	0.131202	1.377e-07	9.35093e-07	2.13547	1.09455	up	yes
Cyp4a14	133.047	35.5336	48.5295	293.153	62.2156	110.876	685.513	538.048	1523.81	693.667	1072.08	1299.09	3.43585e-07	2.20961e-06	0.117572	-3.08838	down	yes
Cpt2	37.508	28.7477	27.8936	39.2698	17.5571	30.1183	61.713	60.4621	71.8193	71.1997	71.9499	68.2613	4.07766e-07	2.59508e-06	0.4467	-1.16262	down	yes
Scd2	0.678124	0.4279	0.391529	0.486786	0.151872	0.407089	1.42372	1.12166	1.21744	1.20395	1.35272	1.03069	1.11703e-06	6.69507e-06	0.346019	-1.53108	down	yes
Plin2	52.5578	35.5794	19.069	50.6482	8.32121	28.6132	88.6308	85.7278	100.969	126.478	104.042	128.921	9.80228e-06	5.13866e-05	0.306866	-1.70432	down	yes
Plin5	15.9595	10.6931	12.1218	16.511	11.2351	9.1367	23.1547	25.0861	31.5562	31.8876	22.5936	40.3525	2.33325e-05	0.000115029	0.43324	-1.20676	down	yes
Acadm	74.6349	55.8678	55.5246	67.238	50.1561	52.3134	106.384	100.579	156.566	126.122	140.999	107.425	3.0949e-05	0.000149739	0.481975	-1.05297	down	yes
Scd1	1053.64	602.582	335.39	432.917	213.987	527.717	2469.15	1769.9	1988.87	1816.35	1732.46	581.752	6.66887e-05	0.000307038	0.305666	-1.70997	down	yes
Cyp4a32	9.63743	8.82711	8.65631	20.2842	5.60354	9.03195	17.0171	18.4347	37.9226	44.6543	22.8293	35.4889	0.000196347	0.000838756	0.35181	-1.50713	down	yes
Fabp7	1.0454	1.4238	1.79687	0.646627	0.481164	0.489212	3.26844	1.98687	2.40484	3.02045	2.84122	3.23507	0.000367661	0.00150326	0.351084	-1.51011	down	yes
Cyp4a10	336.027	222.357	238.814	442.062	173.03	273.715	490.056	368.575	982.298	852.921	733.38	706.596	0.000435597	0.00175663	0.407856	-1.29387	down	yes
Cd36	19.9095	12.4939	9.63549	12.6483	4.4329	9.08395	26.5594	15.243	40.2868	28.6779	41.9248	14.8203	0.00340522	0.011547	0.407159	-1.29634	down	yes
Cyp8b1	71.2378	46.1291	41.3046	76.045	24.5639	48.0994	91.4911	55.6372	139.747	175.838	100.647	128.198	0.00588003	0.0188743	0.444474	-1.16983	down	yes
Acsl1	52.3863	55.4646	47.3273	70.1137	40.088	46.4339	81.9811	89.7283	141.415	128.784	116.617	67.8295	0.00660086	0.0209034	0.497822	-1.0063	down	yes
