# Supplementary material for: Pachymic acid alleviates metabolic dysfunction-associated steatotic liver disease by inhibiting ferroptosis through PPARα
Source: Front Pharmacol. 2025 May 6;16:1554850. doi: 10.3389/fphar.2025.1554850 (PMC12088974; doi:10.3389/fphar.2025.1554850)
Supplement: Supplementary file 5 [file Table5.xls]

## Sheet: Fig2A
Sets	Sets_Num	Count	NC_VS_HFD	Pac_H_VS_HFD	ID
NC_VS_HFD∩Pac_H_VS_HFD	2	737	TRUE	TRUE	ENSMUSG00000061780, ENSMUSG00000081207, ENSMUSG00000028359, ENSMUSG00000068220, ENSMUSG00000117084, ENSMUSG00000090090, ENSMUSG00000024526, ENSMUSG00000026571, ENSMUSG00000024039, ENSMUSG00000051579, ENSMUSG00000069170, ENSMUSG00000012187, ENSMUSG00000042429, ENSMUSG00000030643, ENSMUSG00000110755, ENSMUSG00000035686, ENSMUSG00000028445, ENSMUSG00000030494, ENSMUSG00000026853, ENSMUSG00000021208,…
(Pac_H_VS_HFD)∖(NC_VS_HFD)	1	7026	FALSE	TRUE	ENSMUSG00000048538, ENSMUSG00000024740, ENSMUSG00000029250, ENSMUSG00000034926, ENSMUSG00000039703, ENSMUSG00000054008, ENSMUSG00000003316, ENSMUSG00000116875, ENSMUSG00000049339, ENSMUSG00000079884, ENSMUSG00000020592, ENSMUSG00000032199, ENSMUSG00000039244, ENSMUSG00000044795, ENSMUSG00000062203, ENSMUSG00000029761, ENSMUSG00000074733, ENSMUSG00000027829, ENSMUSG00000081272, ENSMUSG00000022035,…
(NC_VS_HFD)∖(Pac_H_VS_HFD)	1	1324	TRUE	FALSE	ENSMUSG00000029822, ENSMUSG00000020926, ENSMUSG00000034853, ENSMUSG00000107198, ENSMUSG00000000440, ENSMUSG00000006800, ENSMUSG00000025375, ENSMUSG00000008153, ENSMUSG00000038768, ENSMUSG00000109089, ENSMUSG00000108083, ENSMUSG00000042129, ENSMUSG00000029009, ENSMUSG00000037621, ENSMUSG00000025586, ENSMUSG00000002289, ENSMUSG00000026822, ENSMUSG00000028088, ENSMUSG00000006522, ENSMUSG00000047517,…

## Sheet: Fig2C
Pathway_ID	KEGG_Level_1	KEGG_Level_2	Pathway_Name	IDs	S	TS	B	TB	Rich.Factor	P.value	Sig.Sign.P	Q.value	Sig.Sign.Q
mmu04010	Environmental Information Processing	Signal transduction	MAPK signaling pathway	ENSMUSG00000033953|Ppp3r1, ENSMUSG00000025408|Ddit3, ENSMUSG00000001729|Akt1, ENSMUSG00000022610|Mapk12, ENSMUSG00000063358|Mapk1, ENSMUSG00000000149|Gna12, ENSMUSG00000005034|Prkacb, ENSMUSG00000032946|Rasgrp2, ENSMUSG00000059883|Irak4, ENSMUSG00000036402|Gng12, ENSMUSG00000059923|Grb2, ENSMUSG00000032440|Tgfbr2, ENSMUSG00000029999|Tgfa, ENSMUSG00000030341|Tnfrsf1a, ENSMUSG00000021453|Gadd45g, E…	174	4203	284	38194	0.6127	3.31596e-93	****	9.20179e-92	****
mmu04932	Human Diseases	Endocrine and metabolic disease	Non-alcoholic fatty liver disease	ENSMUSG00000025408|Ddit3, ENSMUSG00000021577|Sdha, ENSMUSG00000001729|Akt1, ENSMUSG00000028518|Prkaa2, ENSMUSG00000064370|mt-Cytb, ENSMUSG00000064354|mt-Co2, ENSMUSG00000026457|Adipor1, ENSMUSG00000064358|mt-Co3, ENSMUSG00000064351|mt-Co1, ENSMUSG00000022383|Ppara, ENSMUSG00000020538|Srebf1, ENSMUSG00000000171|Sdhd, ENSMUSG00000030341|Tnfrsf1a, ENSMUSG00000004056|Akt2, ENSMUSG00000021116|Eif2s1, …	97	4203	148	38194	0.6554	2.15911e-56	****	1.67206e-55	****
mmu01212	Metabolism	Global and overview maps	Fatty acid metabolism	ENSMUSG00000025745|Hadha, ENSMUSG00000015474|Ppt2, ENSMUSG00000029545|Acads, ENSMUSG00000020532|Acaca, ENSMUSG00000025465|Echs1, ENSMUSG00000024981|Acsl5, ENSMUSG00000037071|Scd1, ENSMUSG00000028657|Ppt1, ENSMUSG00000006390|Elovl1, ENSMUSG00000027984|Hadh, ENSMUSG00000027195|Hsd17b12, ENSMUSG00000024665|Fads2, ENSMUSG00000059447|Hadhb, ENSMUSG00000031278|Acsl4, ENSMUSG00000030861|Acadsb, ENSMUSG0…	52	4203	62	38194	0.8387	3.80166e-40	****	1.64409e-39	****
mmu03320	Organismal Systems	Endocrine system	PPAR signaling pathway	ENSMUSG00000059316|Slc27a4, ENSMUSG00000021751|Acox2, ENSMUSG00000024122|Pdpk1, ENSMUSG00000000440|Pparg, ENSMUSG00000022383|Ppara, ENSMUSG00000002944|Cd36, ENSMUSG00000024981|Acsl5, ENSMUSG00000037071|Scd1, ENSMUSG00000025006|Sorbs1, ENSMUSG00000030382|Slc27a5, ENSMUSG00000024665|Fads2, ENSMUSG00000015846|Rxra, ENSMUSG00000032418|Me1, ENSMUSG00000031278|Acsl4, ENSMUSG00000028712|Cyp4a31, ENSMUSG…	60	4203	84	38194	0.7143	9.11762e-39	****	3.53043e-38	****
mmu00071	Metabolism	Lipid metabolism	Fatty acid degradation	ENSMUSG00000025745|Hadha, ENSMUSG00000035561|Aldh1b1, ENSMUSG00000053644|Aldh7a1, ENSMUSG00000029545|Acads, ENSMUSG00000025465|Echs1, ENSMUSG00000024981|Acsl5, ENSMUSG00000029455|Aldh2, ENSMUSG00000027984|Hadh, ENSMUSG00000059447|Hadhb, ENSMUSG00000031278|Acsl4, ENSMUSG00000030861|Acadsb, ENSMUSG00000028712|Cyp4a31, ENSMUSG00000037797|Adh4, ENSMUSG00000028715|Cyp4a14, ENSMUSG00000028138|Adh5, ENS…	43	4203	51	38194	0.8431	1.30755e-33	****	3.68994e-33	****
mmu04216	Cellular Processes	Cell growth and death	Ferroptosis	ENSMUSG00000025993|Slc40a1, ENSMUSG00000056234|Ncoa4, ENSMUSG00000032554|Trf, ENSMUSG00000024981|Acsl5, ENSMUSG00000031278|Acsl4, ENSMUSG00000053897|Slc39a8, ENSMUSG00000027610|Gss, ENSMUSG00000023030|Slc11a2, ENSMUSG00000079037|Prnp, ENSMUSG00000038160|Atg5, ENSMUSG00000010095|Slc3a2, ENSMUSG00000003617|Cp, ENSMUSG00000031812|Map1lc3b, ENSMUSG00000027602|Map1lc3a, ENSMUSG00000028124|Gclm, ENSMUS…	33	4203	39	38194	0.8462	3.50271e-26	****	7.47694e-26	****
mmu01040	Metabolism	Lipid metabolism	Biosynthesis of unsaturated fatty acids	ENSMUSG00000037071|Scd1, ENSMUSG00000006390|Elovl1, ENSMUSG00000027195|Hsd17b12, ENSMUSG00000024665|Fads2, ENSMUSG00000072949|Acot1, ENSMUSG00000021228|Acot3, ENSMUSG00000029098|Acox3, ENSMUSG00000025203|Scd2, ENSMUSG00000028937|Acot7, ENSMUSG00000060317|Acnat2, ENSMUSG00000033629|Hacd3, ENSMUSG00000024507|Hsd17b4, ENSMUSG00000010663|Fads1, ENSMUSG00000021226|Acot2, ENSMUSG00000041220|Elovl6, ENS…	27	4203	34	38194	0.7941	3.03257e-20	****	4.99924e-20	****
mmu00062	Metabolism	Lipid metabolism	Fatty acid elongation	ENSMUSG00000025745|Hadha, ENSMUSG00000015474|Ppt2, ENSMUSG00000025465|Echs1, ENSMUSG00000028657|Ppt1, ENSMUSG00000006390|Elovl1, ENSMUSG00000027984|Hadh, ENSMUSG00000027195|Hsd17b12, ENSMUSG00000059447|Hadhb, ENSMUSG00000072949|Acot1, ENSMUSG00000021228|Acot3, ENSMUSG00000028937|Acot7, ENSMUSG00000033629|Hacd3, ENSMUSG00000021226|Acot2, ENSMUSG00000041220|Elovl6, ENSMUSG00000021364|Elovl2, ENSMUS…	24	4203	29	38194	0.8276	6.39302e-19	****	1.00895e-18	****
mmu00061	Metabolism	Lipid metabolism	Fatty acid biosynthesis	ENSMUSG00000020532|Acaca, ENSMUSG00000024981|Acsl5, ENSMUSG00000031278|Acsl4, ENSMUSG00000073422|H2-Ke6, ENSMUSG00000023156|Rpp14, ENSMUSG00000025153|Fasn, ENSMUSG00000048755|Mcat, ENSMUSG00000015016|Acsf3, ENSMUSG00000042010|Acacb, ENSMUSG00000021786|Oxsm, ENSMUSG00000031641|Cbr4, ENSMUSG00000018796|Acsl1, ENSMUSG00000028910|Mecr, ENSMUSG00000032883|Acsl3	14	4203	19	38194	0.7368	2.53909e-10	****	3.04142e-10	****

## Sheet: Fig2D
NAME	SIZE	ES	NES	NOM.pval	FDR.qval
ferroptosis	39	-0.421807	-1.22196	0.146868	0.242401
mapk signaling pathway	284	-0.288661	-1.10863	0.151685	0.375926
ppar signaling pathway	84	0.37511	1.19908	0.142602	0.82723

## Sheet: Fig2E
NAME	SIZE	ES	NES	NOM.pval	FDR.qval
ferroptosis	39	-0.733694	-1.6430709	0	0.00143841
ppar signaling pathway	84	-0.554741	-1.3197838	0.020597322	0.0651533
mapk signaling pathway	284	-0.471938	-1.1892874	0.024	0.180133

## Sheet: Fig2F
gene_name	HFD1	HFD2	HFD3	HFD4	HFD5	HFD6	Pachymic_acid1	Pachymic_acid2	Pachymic_acid3	Pachymic_acid4	Pachymic_acid5	Pachymic_acid6	pval	qval	fc	log2(fc)	regulation	significant
Slc27a4	2.26626	2.00636	1.87972	2.73589	1.49492	1.40764	7.35983	7.25259	8.18864	7.46466	7.53167	7.68031	4.75385e-35	4.63455e-33	0.259266	-1.9475	down	yes
Pdpk1	0.679765	0.512374	0.63743	0.543254	0.366999	0.398332	2.31997	2.18122	2.76959	2.34444	2.59119	1.71597	6.23086e-33	5.03586e-31	0.225404	-2.14942	down	yes
Hmgcs1	18.9008	13.1301	13.8007	14.9445	11.5957	14.4869	8.6275	7.12979	8.45908	5.88004	7.46741	5.85606	8.02041e-31	5.56028e-29	2.00044	1.00031	up	yes
Apoa2	15602	12537.2	13809.1	17479.9	7274.6	14571.8	6907.02	6122.54	6494.32	5238.38	6359.24	5551.79	9.0919e-31	6.26137e-29	2.21618	1.14808	up	yes
Rxra	22.4477	21.7757	23.9659	29.6568	19.5195	19.2086	63.9436	61.6809	72.7028	66.9508	75.1994	65.5458	2.39681e-25	1.00909e-23	0.33637	-1.57188	down	yes
Acsl4	2.24635	1.68155	1.12175	1.84241	0.716723	1.10661	6.57273	5.32089	6.50822	7.11245	6.4537	7.39419	2.84928e-20	7.66946e-19	0.221415	-2.17517	down	yes
Ehhadh	49.6052	30.518	19.251	44.5762	9.24028	19.7465	164.346	145.539	313.312	305.711	253.824	185.406	8.30345e-19	1.95504e-17	0.126403	-2.9839	down	yes
Ppara	4.25657	3.66271	4.02701	5.2328	2.70667	2.80081	14.3712	12.8974	21.7125	22.0687	17.4581	10.0324	2.1629e-17	4.43047e-16	0.230227	-2.11887	down	yes
Acox2	23.1449	17.5872	13.8518	16.4105	10.8161	11.2347	48.1337	67.6495	49.6554	49.0593	52.6972	45.5753	1.26072e-16	2.39822e-15	0.297487	-1.7491	down	yes
Slc27a5	120.284	80.7553	79.814	103.201	39.5798	72.7757	274.438	241.992	258.315	291.945	270.488	268.518	3.05213e-15	5.00881e-14	0.309155	-1.6936	down	yes
Fads2	75.5284	37.4418	30.4779	53.0856	22.7593	36.399	168.769	142.953	150.529	230.097	208.762	144.684	7.8649e-14	1.11986e-12	0.244496	-2.03212	down	yes
Plin4	16.0516	19.6481	33.4225	40.0266	27.8988	28.4477	9.83174	6.39692	14.6856	16.879	11.6641	9.20699	4.31505e-13	5.66091e-12	2.4102	1.26915	up	yes
Apoa5	281.121	185.909	211.956	190.179	126.87	170.234	491.307	393.914	574.371	553.325	542.076	639.448	6.75342e-13	8.65598e-12	0.365093	-1.45366	down	yes
Acsl5	18.1888	9.17757	6.90229	9.67747	3.6595	7.06399	43.4232	41.5189	36.483	36.3482	39.3696	28.7325	6.41695e-12	7.33026e-11	0.242035	-2.04672	down	yes
Sorbs1	0.292411	0.27386	0.292658	0.362331	0.150691	0.224975	0.880711	0.67488	1.31607	1.31843	1.22116	0.628139	3.36789e-11	3.52341e-10	0.264418	-1.91911	down	yes
Me1	19.0781	8.58887	6.39101	8.69543	3.9745	8.13005	45.818	47.0659	42.8824	27.2326	38.708	30.9024	6.37687e-11	6.48644e-10	0.235837	-2.08414	down	yes
Cyp4a31	4.89612	5.04974	3.22469	10.2521	2.10758	4.74678	17.8301	14.3016	36.7447	30.2345	23.3999	31.9261	7.99402e-11	8.03446e-10	0.196048	-2.35072	down	yes
Cpt1b	1.89963	3.18178	2.44842	4.11513	2.10393	1.98494	0.871659	0.774239	0.837199	1.75084	1.20486	1.97288	5.3741e-10	4.86806e-09	2.12284	1.086	up	yes
Cpt1a	30.3111	22.6613	20.3569	23.6118	15.4091	17.4256	40.5065	41.7425	51.0445	69.0104	54.4227	61.4417	9.57758e-08	6.62509e-07	0.407884	-1.29377	down	yes
Cpt1c	0.167555	0.137594	0.128705	0.20565	0.126598	0.139932	0.0699544	0.0716361	0.0471546	0.0509051	0.0534263	0.131202	1.377e-07	9.35093e-07	2.13547	1.09455	up	yes
Cyp4a14	133.047	35.5336	48.5295	293.153	62.2156	110.876	685.513	538.048	1523.81	693.667	1072.08	1299.09	3.43585e-07	2.20961e-06	0.117572	-3.08838	down	yes
Cpt2	37.508	28.7477	27.8936	39.2698	17.5571	30.1183	61.713	60.4621	71.8193	71.1997	71.9499	68.2613	4.07766e-07	2.59508e-06	0.4467	-1.16262	down	yes
Scd2	0.678124	0.4279	0.391529	0.486786	0.151872	0.407089	1.42372	1.12166	1.21744	1.20395	1.35272	1.03069	1.11703e-06	6.69507e-06	0.346019	-1.53108	down	yes
Plin2	52.5578	35.5794	19.069	50.6482	8.32121	28.6132	88.6308	85.7278	100.969	126.478	104.042	128.921	9.80228e-06	5.13866e-05	0.306866	-1.70432	down	yes
Plin5	15.9595	10.6931	12.1218	16.511	11.2351	9.1367	23.1547	25.0861	31.5562	31.8876	22.5936	40.3525	2.33325e-05	0.000115029	0.43324	-1.20676	down	yes
Acadm	74.6349	55.8678	55.5246	67.238	50.1561	52.3134	106.384	100.579	156.566	126.122	140.999	107.425	3.0949e-05	0.000149739	0.481975	-1.05297	down	yes
Scd1	1053.64	602.582	335.39	432.917	213.987	527.717	2469.15	1769.9	1988.87	1816.35	1732.46	581.752	6.66887e-05	0.000307038	0.305666	-1.70997	down	yes
Cyp4a32	9.63743	8.82711	8.65631	20.2842	5.60354	9.03195	17.0171	18.4347	37.9226	44.6543	22.8293	35.4889	0.000196347	0.000838756	0.35181	-1.50713	down	yes
Fabp7	1.0454	1.4238	1.79687	0.646627	0.481164	0.489212	3.26844	1.98687	2.40484	3.02045	2.84122	3.23507	0.000367661	0.00150326	0.351084	-1.51011	down	yes
Cyp4a10	336.027	222.357	238.814	442.062	173.03	273.715	490.056	368.575	982.298	852.921	733.38	706.596	0.000435597	0.00175663	0.407856	-1.29387	down	yes
Cd36	19.9095	12.4939	9.63549	12.6483	4.4329	9.08395	26.5594	15.243	40.2868	28.6779	41.9248	14.8203	0.00340522	0.011547	0.407159	-1.29634	down	yes
Cyp8b1	71.2378	46.1291	41.3046	76.045	24.5639	48.0994	91.4911	55.6372	139.747	175.838	100.647	128.198	0.00588003	0.0188743	0.444474	-1.16983	down	yes
Acsl1	52.3863	55.4646	47.3273	70.1137	40.088	46.4339	81.9811	89.7283	141.415	128.784	116.617	67.8295	0.00660086	0.0209034	0.497822	-1.0063	down	yes
