# Supplementary material for: Pachymic acid alleviates metabolic dysfunction-associated steatotic liver disease by inhibiting ferroptosis through PPARα
Source: Front Pharmacol. 2025 May 6;16:1554850. doi: 10.3389/fphar.2025.1554850 (PMC12088974; doi:10.3389/fphar.2025.1554850)
Supplement: Supplementary file 6 [file Table6.xlsx]

## Sheet: Sheet1
Sets	Sets_Num	Count	NC_VS_HFD	Pac_H_VS_HFD	ID
NC_VS_HFD∩Pac_H_VS_HFD	2	737	TRUE	TRUE	ENSMUSG00000061780, ENSMUSG00000081207, ENSMUSG00000028359, ENSMUSG00000068220, ENSMUSG00000117084, ENSMUSG00000090090, ENSMUSG00000024526, ENSMUSG00000026571, ENSMUSG00000024039, ENSMUSG00000051579, ENSMUSG00000069170, ENSMUSG00000012187, ENSMUSG00000042429, ENSMUSG00000030643, ENSMUSG00000110755, ENSMUSG00000035686, ENSMUSG00000028445, ENSMUSG00000030494, ENSMUSG00000026853, ENSMUSG00000021208,…
(Pac_H_VS_HFD)∖(NC_VS_HFD)	1	7026	FALSE	TRUE	ENSMUSG00000048538, ENSMUSG00000024740, ENSMUSG00000029250, ENSMUSG00000034926, ENSMUSG00000039703, ENSMUSG00000054008, ENSMUSG00000003316, ENSMUSG00000116875, ENSMUSG00000049339, ENSMUSG00000079884, ENSMUSG00000020592, ENSMUSG00000032199, ENSMUSG00000039244, ENSMUSG00000044795, ENSMUSG00000062203, ENSMUSG00000029761, ENSMUSG00000074733, ENSMUSG00000027829, ENSMUSG00000081272, ENSMUSG00000022035,…
(NC_VS_HFD)∖(Pac_H_VS_HFD)	1	1324	TRUE	FALSE	ENSMUSG00000029822, ENSMUSG00000020926, ENSMUSG00000034853, ENSMUSG00000107198, ENSMUSG00000000440, ENSMUSG00000006800, ENSMUSG00000025375, ENSMUSG00000008153, ENSMUSG00000038768, ENSMUSG00000109089, ENSMUSG00000108083, ENSMUSG00000042129, ENSMUSG00000029009, ENSMUSG00000037621, ENSMUSG00000025586, ENSMUSG00000002289, ENSMUSG00000026822, ENSMUSG00000028088, ENSMUSG00000006522, ENSMUSG00000047517,…
