# Supplementary material for: Pachymic acid alleviates metabolic dysfunction-associated steatotic liver disease by inhibiting ferroptosis through PPARα
Source: Front Pharmacol. 2025 May 6;16:1554850. doi: 10.3389/fphar.2025.1554850 (PMC12088974; doi:10.3389/fphar.2025.1554850)
Supplement: Supplementary file 9 [file Table7.xlsx]

## Sheet: Sheet1
Figure.1B
Time(week)	NC								HFD								Pac-L								Pac-H								YSF
0	24	24.6	23.4	23.6	23.7	21.4	22.6	24.1	24.7	21.8	23.9	23.2	23.8	24.5	23.2	23.3	22.4	24.3	23.8	24.8	20.8	24.6	24.4	25.6	25.3	21.2	22.7	25.5	23.4	22.5			25.4	23.7	21.8	22.5	22.5	22.8	22.2	24.3
1	22.8	25.3	23	25.5	23.5	23.6	22.1	25.4	25.1	23.4	24.2	23.7	24.2	23.2	23.1	25.5	25.1	22.5	24.8	22.9	25	21.5	25	25.5	22	23.5	26.1	26.8	23.4	22.7			26.3	24.4	22.7	22.7	24.4	23.5	23.2	24.7
2	25.6	25.1	28.2	26.1	22.5	27.1	24.7	24.4	26.4	24.7	27.3	26.4	23.9	24.9	23.8	27.2	24	26.6	27.2	24.2	26.7	26.3	26.8	22.9	24.3	22.9	27	28.9	24.1	25.8			27.1	23.5	23.7	25.8	26.1	25.2	24.6	25.9
3	25.8	27.1	29	25.1	28.1	25.4	24.8	23.5	28.4	24.9	27.6	27.1	27.7	25	24.3	24.7	24.4	26.6	24.6	27.1	27.8	26.5	23.6	27.1	25.3	24.6	31.7	27.7	25.1	28.5			24.9	28.5	23.5	26.7	27.8	25	27.5	26.3
4	25.7	27.4	30.1	26	23.8	25.8	28.5	25	28.9	28.6	25.9	34	25.5	24.7	29.8	26.3	28.6	26.6	26*	27.8	29.6	27.8	28.6	24.6*	27.7	26.2	32.6	25.4	26.3	29.7			26.7	24.9	28.9	30	27.1	29.4	28.8	26
5	30.7	26.3	27.9	27.4	25.5	24.2	26.4	28.5	29.7	27.4	31.9	30.7	26	26.7	25.5	31.1	24.6*	29	28.8	27	27.7	29.5	25.2*		26.3	27.7	34.6	28.4	29.3	27.5			27	31.1	29.6	24.9	30.1	31	27.5	28.5
6	27.7	27.2	32.9	28.6	24.7	26.1	29.7	28	34.7	31.5	32.2	28.6	26.7	27.3	28.2	33.4	29.1	30.7	30.1	26.3*	29	32.2	26.2*		28.8	29.4	29.2	35.2	32.3	29.9			26.2	33.3	31.9	28.4	32.2	31.5	30.3	30
7	27.3	32.1	29	27.7	25.8	30.9	29.8	27.7	30.1	35.6	31.8	32.8	27.9	28.4	34.5	29.3	29.4	31.5	26.8*	31.9	33.5	27.6*	30.7		29.9	29.6	36.4	28.3	33.6	30.1			26.6	29.1	34	33.6	30.9	30.7	33.7	31.9
8	28.3	28.4	29.6	34.1	25.1	29.3	31.2	27.6	37.2	33.1	30.5	33.9	28.3	35.4	28.1	29.3	33.2	32.4	35	28.2	27.6*	32.3	34.4		30.2	31	29	37.2	31.9	31.9			35.3	26.9	33.7	29.2	33.1	31.9	35	31.9
9	35	28.4	30.5	28.9	31.5	29.1	25.6	27.7	35.6	35	39.1	31.9	38.2	30	30	31.2	30.5	35.5	37.3	34.2	34.1	35	28.5		28.6	30.8	37	30.6	33.6	31.6			33.5	34.9	35.6	30.9	30.7	33.3	29.9	33.6
10	29.1	30.8	31.1	35.3	29.2	26	27.6	31.2	41.5	38.3	37.1	33.7	32.9	32.1	42.1	31.6	35.6	36.5	30.7	38.7	29.1	35	33.9		29.7	29.5	28.6	37.2	30.2	33.6			27.4	33.7	30.3	34.5	29.2	34.2	35
11	29.9	30.9	35.7*	31.5	32.9	27.4	29.7	28.4	40.5	36.3	37.9	33.2	32.9	31.9*	31.2*	39.1	30.8	38.7	36.5	35.4	34.5	30	34.6		28.1	37.2	29.8	29.9	33.1	27.2*	28.5		31.1	30.2	33.1	26.9	34.5	34.2	29
12	35.4*	30.6	30.9	29.3	30	28.4	31.1	25.9*	38.8	36.4	41.1	33.9	34.2	32.5*	41.9	32.5*	36.2	31.2	36	39.2	35.6	29.9	35.2		37.4	29.8	28.5*	28.7	33.1	30	27.2		29.8	31.1	27.6	30.5	32.1	33	32.7	31.9
Figure.1C
NC	HFD	Pac-L	Pac-H	YSF
8.6	53.4	45.9	21.8	22.8
9.3		44.3	24.1	29.4
9.9	91.3	54.9	21.3	22.8
7.4	62.6	29.8	20	31.8
8.6	78.6		40.1	24.7
10.4	48.1		24.1	25.9
	54.7			27.8
				33.4
Figure.1D
NC	HFD	Pac-L	Pac-H	YSF
28.3	63	54.8	60.6	30.5
26.5	65.4	56.5	44.9	41
31.3	54.9	42.9	40.9	35.3
32.4	66.7		45.2	47
25.7	57.5		47.5	47.9
31.9	58.5			55.2
				47.2
				58.7
Figure.1E
NC	HFD	Pac-L	Pac-H	YSF
0.34	0.63	0.51	0.33	0.32
0.4	0.52	0.43	0.3	0.38
0.41	0.62	0.33	0.37	0.33
0.37	0.59	0.35	0.22	0.29
0.32	0.68	0.36	0.26	0.36
0.42	0.72	0.42	0.28	0.41
0.38	0.75	0.37	0.33	0.31
0.45	0.63	0.47	0.35	0.35
Figure.1F
NC	HFD	Pac-L	Pac-H	YSF
1.42	4.25	4.14	2.19	1.73
1.98	3.67	3.43	2.19	1.73
2.09	4.15	4.13	1.99	1.71
1.82	4.33	3.29	2.11	1.65
2.02	3.53	2.99	2.28	2.89
2.07	4.15	4.09	1.82	2.32
1.82	4.7	3.21	2.32	2.06
1.39	5.01	3.11	1.89	1.98
Figure.1G
NC	HFD	Pac-L	Pac-H	YSF
0.38516	0.73036	0.570359	0.54444	0.489143
0.369898	0.765632	0.59902	0.521686	0.514412
0.495324	0.664317	0.546079	0.539446	0.441996
0.419014	0.677082	0.615935	0.55443	0.456786
0.409579	0.756722	0.543468	0.499209	0.528595
0.511696	0.742015	0.719011	0.495602	0.567792
				0.582365
				0.498823
Figure.1H
NC	HFD	Pac-L	Pac-H	YSF
0.073915	0.374421	0.209673	0.262943	0.23688
0.055739	0.347763	0.276152	0.26779	0.24934
0.054527	0.370786	0.183216	0.283542	0.30751
0.064221	0.34534	0.282224	0.319894	0.29062
0.054527	0.357457		0.301718	0.30678
0.056951	0.355034		0.27506	0.27934
				0.22951
				0.26074
Figure.3B
NC	HFD	Pac-L	Pac-H
1.13133	2.20417	0.676695	1.01376
0.921196	2.4572	0.740718	0.763167
0.947477	2.29683	1.70611	0.944578
Figure.3C
NC	HFD	Pac-L	Pac-H
1.01084	1.61856	1.71061	1.92566
0.961247	1.4422	1.27569	1.77455
1.02791	1.20489	1.44341	1.58971
Figure.3D
NC	HFD	Pac-L	Pac-H
0.776192	1.97331	1.44768	1.11473
1.12396	1.70213	1.3145	1.18408
1.09984	1.79376	1.73325	1.04483
Figure.3E
NC	HFD	Pac-L	Pac-H
1.00933	1.2373	0.939987	0.293227
0.981336	1.2373	0.85874	0.314705
1.00933	1.32369	0.85874	0.293227
Figure.3F
NC	HFD	Pac-L	Pac-H
0.759769	2.07555	2.54821	1.85839
1.34642	3.04528	2.73354	1.59611
0.893807	2.60975	2.96138	1.82266
Figure.3G
NC	HFD	Pac-L	Pac-H
0.993674	1.63199	1.00596	0.786298
1.10849	1.57164	0.850781	0.785016
0.897837	1.70911	0.813043	0.560674
Figure.3H
NC	HFD	Pac-L	Pac-H
1.14344	0.514612	1.22281	1.30275
0.876305	0.552137	1.27659	1.33834
0.980257	0.577504	1.33711	1.40938
Figure.3I
NC	HFD	Pac-L	Pac-H
1.00933	0.852384	0.818285	1.28432
0.981336	0.852384	0.895704	1.28432
1.00933	0.911898	0.818285	1.37839
Figure.3J
NC	HFD	Pac-L	Pac-H
0.97338	0.431544	1.29594	1.4262
1.02331	0.390095	1.0534	1.33325
1.00331	0.625286	0.723891	1.21381
Figure.4C
NC	HFD	Pac-L	Pac-H
0.200462	0.578624	0.208375	0.273332
0.198617	0.761825	0.143888	0.251873
0.198617	0.485022	0.104723	0.234735
0.200462	0.645563	0.232958	0.071803
0.160234		0.128176	0.134051
0.213729		0.218055
0.160234
Figure.4E
NC	HFD	Pac-L	Pac-H
1.15972	1.37618	1.02842	0.811158
1.10099	1.34778	0.713167	0.708538
0.739282	1.52891	0.715054	0.524656
Figure.4F
NC	HFD	Pac-L	Pac-H
0.171508	0.538793	0.41515	0.206271
0.187688	0.354064	0.380325	0.241835
0.090718	0.309044	0.158865	0.209991
0.154621	0.374105	0.313274	0.243148
0.166514	0.365973	0.109123	0.18786
0.127207	0.343382	0.143223	0.21917
0.161454	0.324597	0.337625	0.196884
0.181341	0.488802	0.371387	0.207911
0.177434	0.570269		0.223124
0.177434	0.350842		0.15595
	0.428301		0.260287
	0.317193		0.105537
	0.356299		0.130837
	0.358566		0.166583
	0.345352		0.214427
	0.42404
Figure.4G
NC	HFD	Pac-L	Pac-H
0.203831	0.112443	0.135093	0.104857
0.164118	0.097724	0.14385	0.220699
0.181062	0.097635	0.158246	0.192594
0.276282	0.098411	0.137071	0.19285
0.166618	0.096618	0.220907	0.100965
0.141167			0.122061
Figure.4H
NC	HFD	Pac-L	Pac-H
0.660808	0.720663	0.640852	0.660188
0.620698	0.979542	0.640828	0.614569
0.588988	0.787201	0.696747	0.584769
0.656627	0.715921	0.637622	0.6735
0.601422	0.717211	0.676216	0.5745
0.631912	0.987785	0.686231	0.595077
	0.949622	0.676755	0.604767
Figure.4J
NC	HFD	Pac-L	Pac-H
0.956777	0.573065	1.13025	1.34365
0.914291	0.407274	1.22577	1.25296
1.12893	0.490658	0.932268	1.07959
Figure.4K
NC	HFD	Pac-L	Pac-H
1.04206	0.637311	0.934803	1.14388
0.970631	0.708271	0.809602	1.08616
0.987314	0.653981	0.801513	0.877059
Figure.5B
NC	HFD	Pac-L	Pac-H
0.95891	2.47709	0.916589	0.785203
1.03956	2.1967	0.907308	0.829055
1.00153	2.00351	1.10887	0.744958
Figure.5C
NC	HFD	Pac-L	Pac-H
1.04075	1.60585	1.09338	1.03803
0.609159	1.41425	0.75692	0.721058
1.35009	1.89391	1.03912	1.04764
Figure.5D
NC	HFD	Pac-L	Pac-H
0.657233	2.57869	1.44461	0.995419
0.988977	1.24796	1.11656	0.479826
1.35379	1.94541	0.515124	0.371467
Figure.5E
NC	HFD	Pac-L	Pac-H
1.08451	1.13867	0.510696	0.671422
1.06117	1.41282	1.1845	0.615434
0.854315	1.4012	1.24768	0.858178
Figure.6A
NC	HFD	Pac-H	Pac-H+GW6471
1.98	4.2	2.19	4.25
1.82	4.14	2.19	3.67
2.02	4.13	1.99	4.15
1.42	4.7	2.11	4.33
1.82	4.09	2.32	3.53
1.39	5.01	2.22	4.15
1.57	4.6	2.31	3.95
	4.61	2.07
Figure.6B
NC	HFD	Pac-H	Pac-H+GW6471
0.35	0.67	0.23	0.44
0.3	0.47	0.29	0.58
0.34	0.51	0.28	0.41
0.22	0.52	0.26	0.37
0.27	0.42	0.23	0.58
0.22	0.62	0.32	0.48
0.38	0.49	0.3	0.43
		0.25	0.51
Figure.6C
NC	HFD	Pac-H	Pac-H+GW6471
0.45	0.67	0.53	0.64
0.4	0.77	0.49	0.58
0.34	0.83	0.48	0.61
0.32	0.61	0.56	0.57
0.37	0.72	0.53	0.58
0.42	0.82	0.42	0.68
0.38	0.62	0.5	0.63
0.44	0.79	0.45	0.59
Figure.6D
NC	HFD	Pac-H	Pac-H+GW6471
0.073915	0.362943	0.190115	0.374421
0.055739	0.36779	0.209673	0.347763
0.054527	0.383542	0.183216	0.370786
0.064221	0.419894	0.236938	0.34534
0.054527	0.392596	0.282224	0.357457
0.056951	0.451069	0.251069	0.355034
0.063915	0.436939	0.194125
	0.390115
Figure.7B
NC	HFD	Pac-H	Pac-H+GW6471
1.08747	1.51415	1.2354	1.48997
0.939321	1.56978	1.24895	1.50613
0.973205	1.62475	1.27212	1.64817
Figure.7F
NC	HFD	Pac-H	Pac-H+GW6471
1.35393	2.34399	0.872981	1.80981
1.2473	2.43098	1.27075	1.49474
1.39876	2.11866	0.756969	1.50196
Figure.7G
NC	HFD	Pac-H	Pac-H+GW6471
1.18747	1.82475	1.37212	1.74817
1.03932	1.71415	1.24895	1.60613
0.773205	1.76978	1.3354	1.68997
Figure.7I
NC	HFD	Pac-H	Pac-H+GW6471
1.11759	0.654134	0.915242	0.784089
1.08662	0.808509	1.00849	0.616279
0.79579	0.653784	1.01824	0.448334
Figure.7J
NC	HFD	Pac-H	Pac-H+GW6471
1.02119	0.799065	0.918299	0.658732
1.03878	0.712625	0.894792	0.59859
0.940035	0.660151	0.817429	0.737947
Figure.8B
NC	HFD	Pac-H	Pac-H+GW6471
0.198617	0.578624	0.208375	0.495333
0.198617	0.761825	0.243888	0.526944
0.200462	0.782621	0.232958	0.65234
0.160234	0.485022	0.17796	0.67248
0.160234	0.645563	0.218055	0.690561
Figure.8C
NC	HFD	Pac-H	Pac-H+GW6471
0.171508	0.538793	0.280325	0.421893
0.090718	0.343382	0.158865	0.374105
0.154621	0.488802	0.313274	0.559254
0.166514	0.570269	0.143223	0.42404
0.127207	0.428301	0.237625	0.507763
0.161454	0.611481	0.271387	0.458213
Figure.8E
NC	HFD	Pac-H	Pac-H+GW6471
0.960681	1.52325	1.07266	1.52704
1.1002	1.41268	0.986844	1.34283
0.939115	1.33716	0.981404	1.58675
Figure.8F
NC	HFD	Pac-H	Pac-H+GW6471
0.203831	0.097724	0.135093	0.104857
0.164118	0.097635	0.14385	0.112443
0.181062	0.098411	0.158246	0.092953
0.276282	0.096618	0.137071	0.100965
0.166618	0.112443	0.220907	0.122061
Figure.8G
NC	HFD	Pac-H	Pac-H+GW6471
0.620698	0.820663	0.696747	0.80149
0.588988	0.979542	0.637622	0.793269
0.656627	0.787201	0.676216	0.856553
0.601422	0.987785	0.686231	0.93072
0.631912	0.949622	0.676755	0.833772
Figure.8J
NC	HFD	Pac-H	Pac-H+GW6471
0.960681	0.736831	1.32932	0.995041
1.1002	0.785764	1.22296	1.03395
0.939115	0.792608	1.21622	0.875011
Figure.9B
NC	HFD	Pac-H	Pac-H+GW6471
0.486061	2.37603	1.94812	2.45627
1.29496	2.32295	0.991651	1.10752
1.21898	2.23141	0.633947	2.03906
Figure.9C
NC	HFD	Pac-H	Pac-H+GW6471
1.09397	1.70194	1.32964	1.64036
0.952693	1.7565	1.29012	1.63156
0.95334	1.64034	1.31509	1.56604
Figure.9D
NC	HFD	Pac-H	Pac-H+GW6471
0.893967	1.64034	1.22964	1.53156
1.05269	1.6565	1.29012	1.66604
1.05334	1.60194	1.21509	1.74036
Figure.9E
NC	HFD	Pac-H	Pac-H+GW6471
0.993967	1.54034	1.32964	1.73156
1.05269	1.7565	1.29012	1.84036
0.95334	1.70194	1.31509	1.76604
